# Supplementary material for: AlkBH2 promotes the Warburg effect of bladder cancer via activating the PI3K/AKT signaling pathway
Source: Research Square preprint supplement (doi:10.21203/rs.3.rs-7136706/v1), 2025-07-17
Supplement: Supplementary file 1 [file d20282dce29ede899f1cba61.docx]

Table S1

**Sequences of AlkBH2**

| Gene | Sequences |
| --- | --- |
| AlkBH2 forward primer | 5’-TCCTCTTCCGGCACAAAGAC-3’ |
| AlkBH2 reverse primer | 5’-GGGGTGGTTCATCATCAGCA-3’ |
| AlkBH2 silencing | 5’-TGGACAGATTCCTGGTGAAAG-3’ |

Table S2

**Antibodies used for Western blotting**

| Antibody | Company | Solution |
| --- | --- | --- |
| AlkBH2 | Proteintech, Wuhan, China | 1:1000 |
| MCM-2 | Boster, Wuhan, Chian | 1:500 |
| PCNA | Proteintech, Wuhan, China | 1:1000 |
| Cyclins D1 | Abcam, UK | 1:1000 |
| Actin | Servicebio, Wuhan, Chian | 1:500 |
| P56 | Boster, Wuhan, Chian | 1:500 |
| P16 | Cell signaling technology, USA | 1:1000 |
| Rb | Proteintech, Wuhan, China | 1:1000 |
| E-Cadherin | Servicebio, Wuhan, Chian | 1:500 |
| Vimentin | Boster, Wuhan, Chian | 1:500 |
| Snail | Abcam, UK | 1:1000 |
| FGFR | Servicebio, Wuhan, Chian | 1:500 |
| RAS | Boster, Wuhan, Chian | 1:500 |
| RAF | Boster, Wuhan, Chian | 1:500 |
| MEK | Boster, Wuhan, Chian | 1:500 |
| ERK | Proteintech, Wuhan, China | 1:500 |
| P-PI3K | Abcam, UK | 1:500 |
| PI3K | Abcam, UK | 1:1000 |
| P-AKT | Abcam, UK | 1:500 |
| AKT | Abcam, UK | 1:1000 |
